# Supplementary material for: Students’ perspectives of factors related to delayed completion of online RN-BSN programs
Source: PubMed Central journal article supplement (PMC8025495; doi:10.1186/s12912-021-00574-7), 2021-04-07
Supplement: 12912_2021_574_MOESM1_ESM.pdf [file 12912_2021_574_MOESM1_ESM.pdf]

**IRB approved Demographic data collection form**

|    | <b>Questions</b>                                   | <b>Responses</b> |
|----|----------------------------------------------------|------------------|
|    | <b>Pseudonym</b>                                   |                  |
| 1. | What is your gender?                               |                  |
| 2. | What is your age?                                  |                  |
| 3. | What is your race or ethnicity?                    |                  |
| 4. | How many years have you been a nurse?              |                  |
| 5. | In what type of setting do you primarily practice? |                  |
| 6. | How long have you been in the RN to BSN program?   |                  |
